# Supplementary material
Source: PubMed Central journal article supplement (PMC2906901)
Supplement: 0914127107_pnas.200914127SI.pdf [file 0914127107_pnas.200914127SI.pdf]

# Supporting Information

Jeannet et al. 10.1073/pnas.0914127107

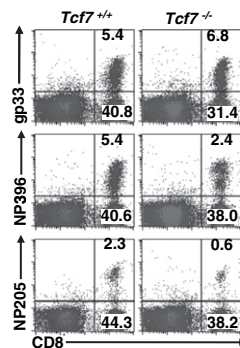

**Fig. S1.** Primary CD8 T cell response of *Tcf7*<sup>-/-</sup> mice to LCMV infection. *Tcf7*<sup>+/+</sup> (B6) and *Tcf7*<sup>-/-</sup> mice were infected with LCMV and the CD8 T cell response was investigated at day 8 postinfection using phycoerythrin-labeled D<sup>b</sup> gp33 (KAVYNFATA), D<sup>b</sup> NP396 (FQPQNGQFI), and K<sup>b</sup> NP205 (YTVKYPNL) tetramers. Density plots show gated peripheral blood lymphocytes stained with the indicated tetramer and anti-CD8 mAb. Numbers indicate the percentage of cells in the respective quadrants.

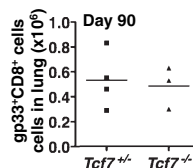

**Fig. S2.** Antigen-specific CD8 T cells in nonhematopoietic organs of *Tcf7*<sup>-/-</sup> mice. Symbols depict the absolute number of gp33-specific CD8 T cells in the lung of individual mice at day 90 post LCMV infection.

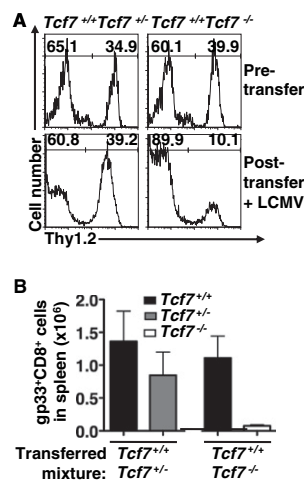

**Fig. S3.** Competitive recall response of *Tcf7*<sup>-/-</sup> and *Tcf7*<sup>+/-</sup> CD8 T cells to LCMV challenge infection. Splenocytes from LCMV immune *Tcf7*<sup>+/+</sup> or *Tcf7*<sup>-/-</sup> mice (Thy1.2 CD45.2) were mixed with those from *Tcf7*<sup>+/+</sup> (B6) mice (Thy1.1 CD45.2) (all around day 50 postinfection) such that each population contained an equal number ( $5 \times 10^4$ ) of gp33<sup>+</sup> CD8<sup>+</sup> T cells (A Upper). After transfer into naïve B6 recipients (Thy1.2 CD45.1), recipient mice were infected with LCMV and spleens were analyzed 5 days later (Lower). Histograms show gated CD45.2<sup>+</sup> gp33<sup>+</sup> CD8<sup>+</sup> cells stained for Thy1.2. Numbers indicate the percentage of *Tcf7*<sup>+/+</sup> or *Tcf7*<sup>-/-</sup> (Thy1.2<sup>+</sup>) relative to *Tcf7*<sup>+/+</sup> (B6) (Thy1.2<sup>-</sup>) cells. (B) The bar graph depicts the mean number ( $\pm$  SD) of gp33-specific CD8 T cells derived from *Tcf7*<sup>+/+</sup> or *Tcf7*<sup>-/-</sup> (Thy1.2) or from cotransferred *Tcf7*<sup>+/+</sup> (B6) (Thy1.1) donors in spleens of recipient mice 5 days after LCMV challenge infection.

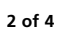

**Fig. S4.** Phenotypic analysis of LCMV-specific CD8 T cells (A) Density plots show the expression of CD127 (IL7R $\alpha$ ) versus CD62L in gated gp33-specific CD8 T cells from the indicated LCMV immune mice at day 8 and day 58 post-LCMV infection. (B) Histograms show CD62L expression among gated CD8 T cells of naive and of day 58 LCMV immune mice (*Top*) and among gated gp33-specific CD8 T cells (*Middle*). Dot plots show the expression of CD127 versus KLRG1 among gated CD62L<sup>hi</sup> cells (*Bottom*). The respective gating is shown in the middle panel and was done according to the CD62L levels of naive CD8 T cells. Numbers indicate the percentage of cells in the respective gate or quadrants.



**Table S3. Antigen-specific CD4 T cell response to LCMV infection**

| Strain                     | Day 8                                      | >Day 50                                    |
|----------------------------|--------------------------------------------|--------------------------------------------|
|                            | IFN $\gamma$ +CD4 $^{+}$ ( $\times 10^5$ ) | IFN $\gamma$ +CD4 $^{+}$ ( $\times 10^5$ ) |
| <i>Tcf7</i> <sup>+/+</sup> | 2.8 $\pm$ 1.1*                             | 0.37 $\pm$ 0.15                            |
| <i>Tcf7</i> <sup>+/-</sup> | 8.4 $\pm$ 6.5                              | 0.29 $\pm$ 0.12                            |
| <i>Tcf7</i> <sup>-/-</sup> | 6.1 $\pm$ 2.5                              | 0.47 $\pm$ 0.37                            |

\*Mean absolute number ( $\pm$  SD) of gp61-specific (IFN $\gamma$ +) CD4 T cells per spleen at day 8 and >day 50 post-LCMV infection.  $n = 3-4$ .
